# Supplementary material for: Finnish National Esophago-Gastric Cancer Cohort (FINEGO) for studying outcomes after oesophageal and gastric cancer surgery: a protocol for a retrospective, population-based, nationwide cohort study in Finland
Source: PubMed Central journal article supplement — BMJ Open. 2019 Jan 15;9(1):e024094. doi: 10.1136/bmjopen-2018-024094 (PMC6340442; doi:10.1136/bmjopen-2018-024094), 2019-01-15
Supplement: bmjopen-2018-024094supp001.pdf [file bmjopen-2018-024094supp001.pdf]

**Supplementary Table 1.** The diagnosis codes used to identify patients with esophageal and gastric cancer. The use of ICD-9 and ICD-10 overlapped, and therefore, both codes are used for searching for patients in 1995-1997.

|                       | ICD-9 (before 1997) | ICD-10 (1995 and after) |
|-----------------------|---------------------|-------------------------|
| Oesophageal cancer    | 150                 | C15                     |
| Gastric cardia cancer | 151A                | C16.0                   |
| Gastric cancer        | 151B - 151X         | C16.1 - C16.9           |

**Supplementary Table 2.** The surgical codes used to identify patients undergoing surgical treatment for esophago-gastric cancer.

|                                                                 | THL Surgical Codes (1983-1996)                       | NOMESCO classification (1996 - )                                     |
|-----------------------------------------------------------------|------------------------------------------------------|----------------------------------------------------------------------|
| Oesophageal resection                                           | 6201, 6202, 6203, 6204, 6205, 6209                   | JCC00, JCC10, JCC11, JCC12, JCC20, JCC30, JCC96, JCC97               |
| Resection of the cardia                                         | 6301, 6320                                           | Not applicable                                                       |
| Gastric resection:                                              | 6314, 6315, 6316, 6317, 6318, 6321, 6322, 6323, 6329 | JDC00, JDC10, JDC11, JDC20, JDC30, JDC40, JDC96, JDC97, JDD00, JDD96 |
| Endoscopic mucosal resection / Endoscopic submucosal dissection | Not applicable                                       | JCA45, JCA52, JDA45, JDA52, JDH52                                    |

**Supplementary Table 3.** The definition of Charlson's comorbidity index.

The Charlson's comorbidity index will be calculated according to Armitage et al.<sup>1</sup> using hospital admissions up to 3 years before the index admission (surgery), and the index admission, and will exclude esophago-gastric malignancies.

| <b>Disease</b>              | <b>ICD-10 codes</b>                                                              |
|-----------------------------|----------------------------------------------------------------------------------|
| Myocardial infarction       | I21*, I22*, I23*, I252                                                           |
| Congestive cardiac failure  | I11, I13, I255, I42, I43, I50, I517                                              |
| Peripheral vascular disease | I70–I73, I770, I771, K551, K558, K559, R02, Z958, Z959                           |
| Cerebrovascular disease     | G45, G46, I60–I69                                                                |
| Dementia                    | A810, F00–F03, F051, G30, G31                                                    |
| Chronic pulmonary disease   | I26, I27, J40–J45, J46*, J47, J60–J67, J684, J701, J703                          |
| Rheumatological disease     | M05, M06, M09, M120, M315, M32–M36                                               |
| Liver disease               | B18, I85, I864, I982, K70, K71, K721, K729, K76, R162, Z944                      |
| Diabetes mellitus           | E10–E14                                                                          |
| Hemiplegia or paraplegia    | G114, G81–G83                                                                    |
| Renal disease               | I12, I13, N01, N03, N05, N07, N08, N171*, N172*, N18, N19*, N25, Z49, Z940, Z992 |
| Any malignancy              | C00–C14, C17–C26, C30–C34, C37–C41, C43, C45–C58, C60–C76, C80–C85, C88, C90–C97 |
| Metastatic solid tumour     | C77–C79                                                                          |
| AIDS/HIV infection          | B20–B24                                                                          |

\*Will be only taken into account for previous, not current, hospital admissions, because these are common complications after surgery and cause confounding to the comorbidity index.

## References

1. Armitage JN, van der Meulen JH, Royal College of Surgeons Co-morbidity Consensus G. Identifying co-morbidity in surgical patients using administrative data with the Royal College of Surgeons Charlson Score. *Br J Surg* 2010;97(5):772-81. doi: 10.1002/bjs.6930
