# Supplementary material for: Finnish National Esophago-Gastric Cancer Cohort (FINEGO) for studying outcomes after oesophageal and gastric cancer surgery: a protocol for a retrospective, population-based, nationwide cohort study in Finland
Source: PubMed Central journal article supplement — BMJ Open. 2019 Jan 15;9(1):e024094. doi: 10.1136/bmjopen-2018-024094 (PMC6340442; doi:10.1136/bmjopen-2018-024094), 2019-01-15
Supplement: bmjopen-2018-024094supp002.pdf [file bmjopen-2018-024094supp002.pdf]

# FINEGO clinical data collection form

**Personal identification number:**.....

**1 Hospital:** .....

**2 Operation date:**.....

**3 Surgeon(s)** 1:..... (First name, Surname)

2: .....

3: .....

**4 Anesthesiologist(s):** 1:..... (First name, Surname)

2:.....

3:.....

**5 Operation codes:**.....

**6 Anesthesia codes:**.....

**7 Sex:**  
1. Man  
2. Woman

**8 Tumor localization**  
1. Upper 1/3 (upper border <25 cm from incisors)  
2. Middle 1/3 (upper border 25-30 cm)  
3. Lower 1/3 (upper border >30 cm)  
4. Cardia, Siewert type 2 (center -1 - +2cm from Z line)  
5. Cardia, Siewert type 3 (center 2-5cm below Z line)  
6. Stomach body  
7. Stomach distal  
999 Not clear

**9 Treatment determined in multidisciplinary meeting**

0. No

1. Yes

**10 Preop Treatment:**  
0. No  
1. Yes  
998. Not clear

**11 Type of treatment:**  
1. Chemotherapy  
2. Radiation  
3. Radiation+Chemotherapy

**12 Complications of neoadjuvant treatment**

0. None, completed as planned

1. Yes, with delay/reduction, why \_\_\_\_\_

2. Yes, with termination, why \_\_\_\_\_

|                            |               |             |                      |
|----------------------------|---------------|-------------|----------------------|
| <b>13 Preoperative lab</b> | <b>Value</b>  | <b>Date</b> | <b>Not available</b> |
|                            | Hb: _____     | _____       | _____                |
|                            | Alb: _____    | _____       | _____                |
|                            | Prealb: _____ | _____       | _____                |
|                            | CRP _____     | _____       | _____                |
|                            | BMI _____     | _____       | _____                |

**14 ASA Class** \_\_\_\_\_

- 15 Resection type:**  
(circle)
1. Transthoracic resection: a. Ivor-Lewis, b. McKeown
  2. Transhiatal resection
  3. Total gastrectomy
  4. Proximal gastrectomy
  5. Distal gastrectomy
  6. Other \_\_\_\_\_

- 16 Intent of surgical approach**
1. Open surgery
  2. Hybrid thoroscopic
  3. Hybrid laparoscopic
  4. Totally minimally invasive (thoracoscopy + laparoscopy)
  5. Totally laparoscopic (no thoracotomy/scopy)
  5. Other \_\_\_\_\_

- 16.1 Only minimally invasive surgery: converted open?**
0. No
  1. Converted to hybrid
  2. Yes

- |                           |                      |                       |
|---------------------------|----------------------|-----------------------|
| <b>17 Lymphadenectomy</b> | <b>Esophagectomy</b> | <b>Gastrectomy</b>    |
|                           | 1. 2-field           | 4. D0 lymphadenectomy |
|                           | 2. Extended 2-field  | 5. D1 lymphadenectomy |
|                           | 3. 3-field           | 6. D2 lymphadenectomy |
|                           |                      | 7. D3 lymphadenectomy |
|                           |                      | 999. Unclear          |

**18 Tumor length: ..... mm**

- 19 Substitute:**
1. Stomach
  2. Small intestine
  3. Colon

- 20 Type of anastomosis:**
1. Handsewn:
  2. Staples

- 21 Location of anastomosis:**
1. Neck
  2. Thorax
  3. Abdomen

- 22 Splenectomy:**
1. Yes: why? .....
  2. No

- 23 Use of energy devices**
1. Bipolar (LigaSure)
  2. Ultrascision (Harmonic),
  3. Hybrid (Thunderbeat)
  4. Other .....
  5. No

- 24 Fundoplication:**
1. Before surgery: type? .....
  2. During surgery: type? .....
  3. No

- 25 Frozen section (circle all that apply):**
1. Distal resection margin
  2. Proximal resection margin
  3. Lymph node
  4. None
  998. Not clear

- 26 Jejunio-cath (feeding enterostomy):**
1. Yes
  2. No

- 27 Curative intended treatment:**
1. Yes
  2. No (palliative resection)
  3. Rescue surgery (after curative chemoradiation)
  998. Not clear

**28 Duration of surgery:** ..... min (surgery start-stop)

**29 Peroperative bleeding**..... ml

For the following, count only midnights; morning Wednesday to evening Thursday = 1

**30 Days at the ICU** .....

**31 Days in respirator:** .....

**32 Days in hospital:** .....

- 33 Further treatment in:**
1. Home
  2. Health care center (terveyskeskus)
  3. Another hospital
  4. Rehabilitation center
  5. Other \_\_\_\_\_

- 34 Complications in 90 days after operation:**
1. No
  2. Yes (fill in pages 6-10)

- 35 Reoperations in 90 days after operation:**
1. No
  2. Yes (fill in pages 6-10)

- 36 Adjuvant treatment**
- 1.No
  2. Chemotherapy
  3. Radiotherapy

- 37 Adjuvant treatment status**
1. Completed without complications
  2. Complications: \_\_\_\_\_
  3. Not completed, why? \_\_\_\_\_

**38 Proximal resection margin: ..... mm**

**39 Distal resection margin: ..... mm**

**40 Circumferential resection margin: ..... mm**

**41 Histology:**

1. Adenocarcinoma
2. Squamous cell carcinoma
3. High-grade dysplasia
4. Low-grade dysplasia
5. Other \_\_\_\_\_

999 Not clear

**41.1 Laurén class:**

1. Diffuse
2. Intestinal
3. Indeterminate

999. Unavailable

**41.2 WHO histology classification (gastric cancer)**

1. Papillary
2. Tubular
3. Mucinous
4. Signet ring / poorly cohesive
5. Other types, which \_\_\_\_\_

999. Unavailable

**42 Preoperative stage (before any treatment)**

**T:**

- 1 Tis
- 2 T1 – T3
- 3 T1
- 4 T2
- 5 T3
- 6 T4
- 7 Tx
- 8 T0

**43 N:**

- 1 N0
- 2 N1
- 3 N2
- 4 N3

999 not clear

**44 M:**

- 0 M0
- 1 MIa
- 2 MIb

999 Not Clear

**45 Postoperative stage (According to PAD or patient records)**

- T:**
- 1 Tis
  - 2 T1 – T3
  - 3 T1
  - 4 T2
  - 5 T3
  - 6 T4
  - 7 Tx
  - 8 T0

- 46 N:**
- 1 N0
  - 2 N1
  - 3 N2
  - 4 N3
  - 999 not clear

**47 Lymph nodes with metastasis:** ..... pcs

**48 Number of Lymph nodes examined:**..... pcs

- 49 M:**
- 0 M0
  - 1 MIa
  - 2 MIb
  - 999 Not Clear

- 50 G/Differentiation:**
1. G1, well differentiated
  2. G2, moderately differentiated
  3. G3, poorly differentiated
  4. GX, cannot be assessed

- 51 Tumor stage:**
- 0 0 (pat only op)
  - 1 I
  - 2 IIA
  - 3 IIB
  - 4 III
  - 5 IV
  - 6 IVA
  - 7 IVB
  - 8 No cancer/dysplasia
  - 9 Complete response after neo
  - 999 not clear

- 52 Micr radically:**
- 0 No
  - 1 Yes
  - 999 Not clear

- 54 R0/R1/R2**
- 1 R0
  - 2 R1
  - 3 R2
  - 999 not clear

- 53 Macr radically:**
- 0 No
  - 1 Yes
  - 999 Not Clear

- 55 Becker regression grade:**
1. No tumor left (1a)
  2. <10% tumor left (1b)
  3. <10-50% tumor left (2)
  4. >50% tumor left (3)
  999. Not applicable

## COMPLICATIONS

**56 Complications during 30 days after surgery (circle) and 30-90 days after surgery (square)  
-Mark the main categories and all sub-categories that apply!**

1. Pulmonary complications
  - a. Pneumonia
  - b. Pleural effusion requiring additional drainage procedure
  - c. Pneumothorax requiring treatment
  - d. Atelectasis mucous plugging requiring bronchoscopy
  - e. Respiratory failure requiring intubation
  - f. Acute respiratory distress syndrome (ARDS)
  - g. Acute aspiration
  - h. Tracheobronchial injury
  - i. Chest tube for air leak over 10 days postop
  
2. Cardiac complications
  - a. Cardiac arrest requiring CPR
  - b. Myocardial infarction (Troponin + ECG)
  - c. Atrial dysrhythmia requiring treatment
  - d. Ventricular dysrhythmia requiring treatment
  - e. Congestive heart failure requiring treatment
  - f. Pericarditis requiring treatment

3. Gastrointestinal complications
  - a. Esophagoenteric leak from anastomosis or conduit necrosis
    - i. Type 1: local defect requiring no change in therapy, treated medically or diet
    - ii. Type 2: requiring intervention, no surgery (radiology, stent, bedside opening)
    - iii. Type 3: Defect requiring surgery
  - b. Conduit necrosis/failure
    - i. Type 1: Focal conduit necrosis identified endoscopically, causes additional monitoring or non-surgical therapy
    - ii. Type 2: Focal conduit necrosis, treated by surgical therapy but not diversion
    - iii. Type 3: Conduit necrosis requiring conduit resection and diversion
  - c. Ileus preventing or delaying enteral feeding
  - d. Small bowel obstruction
  - e. Feeding J-tube complication
  - f. Pyloromyotomy/pyloroplasty complication
  - g. Clostridium infection
  - h. GI bleeding requiring intervention or transfusion
  - i. Delayed conduit emptying requiring intervention or delaying discharge, or requiring nasogastric tube >7 days
  - j. Pancreatitis
  - k. Pancreatic fistula
  - l. Liver dysfunction
  - m. Biliary leakage

4. Urologic
  - a. Acute renal failure (doubling of baseline creatinine)
  - b. Acute renal failure requiring dialysis
  - c. Urinary tract infection
  - d. Urinary retention requiring re-insertion of catheter, delaying discharge, or discharge with catheter
  
5. Thromboembolic
  - a. DVT (ultrasound or angio verified)
  - b. Pulmonary embolism
  - c. Stroke (defined by CT or similar)
  - d. Peripheral thrombophlebitis (clinically verified)
  
6. Neurologic / psychiatric
  - a. Recurrent nerve paresis (mark: A unilateral, B bilateral)
    - i. Type 1: Transient injury, requires no other therapy than dietary modification
    - ii. Type 2: Injury requiring elective surgery (thyroplasty or medialization procedure)
    - iii. Type 3: Injury requiring acute surgery due to aspiration or respiratory issues
  - b. Other neurologic injury
  - c. Acute delirium
  - d. Delirium tremens (alcohol withdrawal symptom)



7. Infection
  - a. Wound infection requiring opening wound or antibiotics
  - b. Central line infection requiring removal or antibiotics
  - c. Intra-abdominal abscess
  - d. Intrathoracic abscess
  - e. Sepsis
  - f. Other infection requiring antibiotics, what .....
  
8. Wound/diaphragm
  - a. Thoracic wound dehiscence
  - b. Acute abdominal wall dehiscence / hernia
  - c. Acute diaphragmatic hernia
  
9. Other
  - a. Chyle leak (Mark: A. <1 liter per day, B >1 liter per day)
    - i. Type 1: requires dietary modifications, but not totally parenteral nutrition
    - ii. Type 2: requires totally parenteral nutrition
    - iii. Type 3: requires surgery or other intervention (chest drains not included)
  - b. Reoperation for reason other than bleeding, anastomotic leak or conduit necrosis,  
reason.....
  - c. Multiple organ failure

**57 Clavien-Dindo classification for complications (only the most severe grade to be ticked)**

- 0. No complications
- 1. Grade 1 (Any deviation from postoperative course, including antiemetics, antipyretics, analgetics, diuretics and electrolytes and physiotherapy or opening the wound bedside)\*
- 2. Grade 2 (Blood transfusion, total parenteral nutrition or pharmacological treatment needed other than I)
- 3. Grade 3 (Surgical, endoscopic or radiological intervention)
- 4. Grade 4 (Life-threatening complications requiring IC/ICU-management, or stroke (not TIA) or any brain hemorrhage)
- 5. Grade 5 (Death of a patient)

**58 REOPERATIONS**

**Reoperation 1**

Days from primary operation: \_\_\_\_\_

Reason for operation: \_\_\_\_\_

Result: \_\_\_\_\_

**Reoperation 2**

Days from primary operation: \_\_\_\_\_

Reason for operation: \_\_\_\_\_

Result: \_\_\_\_\_

**Reoperation 3**

Days from primary operation: \_\_\_\_\_

Reason for operation: \_\_\_\_\_

Result: \_\_\_\_\_
